# Supplementary material for: Modeling the Contributions of Ca2+ Flows to Spontaneous Ca2+ Oscillations and Cortical Spreading Depression-Triggered Ca2+ Waves in Astrocyte Networks
Source: PubMed Central journal article supplement (PMC3485305; doi:10.1371/journal.pone.0048534), 2012-10-31
Supplement: pone.0048534.s006.pdf [file pone.0048534.s006.pdf]

Table S1. The parameter values used in the model.

| Parameter            | Definition                                                                     | Value*                                   |
|----------------------|--------------------------------------------------------------------------------|------------------------------------------|
| $g_{\text{VGCC}}$    | Membrane conductance of the VGCCs                                              | 174.4 pS                                 |
| $V_{\text{astro}}$   | Volume of an astrocyte                                                         | $5.233 \times 10^{-13}$ l                |
| $g_{\text{pump}}$    | Membrane conductance of the pump                                               | 3 pS                                     |
| $L_{\text{ext}}$     | Rate of $\text{Ca}^{2+}$ efflux from astrocytes                                | $0.5 \text{ s}^{-1}$                     |
| $M_{\text{CICR}}$    | Maximum flux rate of $\text{Ca}^{2+}$ into the cytosol                         | $40 \text{ s}^{-1}$                      |
| $S_{\text{act}}$     | Activating affinity                                                            | $1.5 \times 10^{-4}$ mM                  |
| $S_{\text{inh}}$     | Inhibiting affinity                                                            | $1.5 \times 10^{-4}$ mM                  |
| $S_{\text{IP}_3}$    | Half-saturation constant for $\text{IP}_3$ activation of $\text{IP}_3\text{R}$ | $1 \times 10^{-4}$ mM                    |
| $n$                  | Hill coefficient                                                               | 2.02                                     |
| $m$                  | Hill coefficient                                                               | 2.2                                      |
| $M_{\text{SERCA}}$   | Maximum flux across SERCA                                                      | 0.015 mM/s                               |
| $S_{\text{SERCA}}$   | Half-saturation constant for SERCA activation                                  | 0.0001 mM                                |
| $L_{\text{int}}$     | Rate of $\text{Ca}^{2+}$ efflux from the ER                                    | $0.5 \text{ s}^{-1}$                     |
| $D_{\text{Cai}}$     | Diffusion coefficient for $\text{Ca}^{2+}$ in cytosol                          | $200 \mu\text{m}^2/\text{s}$             |
| $D_{\text{Cao}}$     | Diffusion coefficient for $\text{Ca}^{2+}$ in the ECS                          | $790 \mu\text{m}^2/\text{s}$             |
| $K_{\text{omax}}$    | Maximum $K_{\text{o}}$ in ECS during CSD                                       | 40 mM                                    |
| $Ca_{\text{orest}}$  | $Ca_{\text{o}}$ at the resting level                                           | 1 mM                                     |
| $M_{\text{Ca}}$      | Rate constant reflecting the influence of CSD                                  | 0.0063                                   |
| $S_{\text{PLC}}$     | Half-saturation constant for $\text{Ca}^{2+}$ activation of PLC                | $3 \times 10^{-4}$ mM                    |
| $M_{\text{deg}}$     | Rate of $\text{IP}_3$ degradation                                              | $0.08 \text{ s}^{-1}$                    |
| $M_{\text{PLC}}$     | Maximum production rate of PLC                                                 | $5 \times 10^{-5}$ mM/s                  |
| $\gamma$             | Gap junction strength                                                          | $2 \text{ s}^{-1}$                       |
| $D_{\text{IP}_3}$    | Diffusion coefficient for $\text{IP}_3$ in the ICS                             | $280 \mu\text{m}^2/\text{s}$             |
| $D_{\text{Ko}}$      | Diffusion coefficient for $\text{K}^+$ in the ECS                              | $1960 \mu\text{m}^2/\text{s}$            |
| $M_{\text{KK}}$      | Rate coefficient of $\text{K}^+$ dynamics in the ECS                           | $-0.03 \text{ mM}^{-2} \text{ s}^{-1}$   |
| $K_{\text{orest}}$   | $K_{\text{o}}$ at the resting level                                            | 3.5 mM                                   |
| $K_{\theta}$         | Threshold for triggering of CSD                                                | 10 mM                                    |
| $M_{\text{KR}}$      | Rate constant for recovery of $\text{K}^+$ in the ECS                          | $2.56 \text{ mM}^{-1} \text{ s}^{-2}$    |
| $M_{\text{R}}$       | Rate constant for decay of $\text{K}^+$ in the ECS                             | $7.5 \text{ s}^{-1}$                     |
| $M_{\text{Ki}}$      | Rate coefficient of $\text{K}^+$ dynamics in the ICS                           | $-0.003 \text{ mM}^{-2} \text{ s}^{-1}$  |
| $M_{\text{io}}$      | Rate constant for decay of $\text{K}^+$ in the ICS                             | $0.2 \text{ s}^{-1}$                     |
| $K_{\text{irest}}$   | $K_{\text{i}}$ at the resting level                                            | 130 mM                                   |
| $K_{\text{i}\theta}$ | Threshold for fast $\text{K}^+$ elevation in the ICS                           | 140 mM                                   |
| $K_{\text{imax}}$    | Maximum $K_{\text{i}}$ in ICS during CSD                                       | 155 mM                                   |
| $A_{\text{ki}}$      | Rate constant for discharge of $\text{K}^+$ in the ICS                         | $2.56 \text{ mM}^{-1} \text{ s}^{-2}$    |
| $A_{\text{r}}$       | Rate constant for decay of $\text{K}^+$ in the ICS                             | $0.75 \text{ s}^{-1}$                    |
| $R$                  | Ideal gas constant                                                             | $8.31 \text{ J mol}^{-1} \text{ K}^{-1}$ |
| $T$                  | Absolute temperature                                                           | 293 K                                    |
| $F$                  | Faraday constant                                                               | 96485 C/mol                              |
| $z_{\text{K}}$       | Valence of $\text{K}^+$                                                        | 1                                        |
| $z_{\text{Ca}}$      | Valence of $\text{Ca}^{2+}$                                                    | 2                                        |
| $\varepsilon$        | Modulation factor                                                              | 17 mV                                    |

\*The values of parameters for the Ca<sup>2+</sup> flows through the membrane of astrocytes or through the membrane of the ER were taken from the previous studies [1-4]. The values of parameters for the extracellular Ca<sup>2+</sup> concentration and CSD were chosen in order to allow the generation of CSDCWs. With these parameters, the properties of CASs and CSDCWs in the simulations are consistent with the reported literature values [2,3,5,6].

## References

1. Zeng S, Li B, Zeng S, Chen S (2009) Simulation of spontaneous Ca<sup>2+</sup> oscillations in astrocytes mediated by voltage-gated calcium channels. *Biophys J* 97: 2429-2437.
2. Lavrentovich M, Hemkin S (2008) A mathematical model of spontaneous calcium(II) oscillations in astrocytes. *J Theor Biol* 251: 553-560.
3. Bennett MR, Farnell L, Gibson WG (2008) A quantitative model of cortical spreading depression due to purinergic and gap-junction transmission in astrocyte networks. *Biophys J* 95: 5648-5660.
4. Dronne MA, Boissel JP, Grenier E (2006) A mathematical model of ion movements in grey matter during a stroke. *J Theor Biol* 240: 599-615.
5. Tashiro A, Goldberg J, Yuste R (2002) Calcium oscillations in neocortical astrocytes under epileptiform conditions. *J Neurobiol* 50: 45-55.
6. Parri HR, Gould TM, Crunelli V (2001) Spontaneous astrocytic Ca<sup>2+</sup> oscillations in situ drive NMDAR-mediated neuronal excitation. *Nat Neurosci* 4: 803-812.
