# Supplementary material for: Modeling the Contributions of Ca2+ Flows to Spontaneous Ca2+ Oscillations and Cortical Spreading Depression-Triggered Ca2+ Waves in Astrocyte Networks
Source: PubMed Central journal article supplement (PMC3485305; doi:10.1371/journal.pone.0048534), 2012-10-31
Supplement: pone.0048534.s007.pdf [file pone.0048534.s007.pdf]

Table S2. The initial values of the variables.

| Parameter | Description                        | Value (unit) |
|-----------|------------------------------------|--------------|
| $IP_3$    | $IP_3$ concentration in the ICS    | 0.0001 mM    |
| $Ca_i$    | $Ca^{2+}$ concentration in the ICS | 0.0001 mM    |
| $Ca_{ER}$ | $Ca^{2+}$ concentration in the ER  | 0.00015 mM   |
| $Ca_o$    | $Ca^{2+}$ concentration in the ECS | 1 mM         |
| $K_o$     | $K^+$ concentration in the ECS     | 3.5 mM       |
| $K_i$     | $K^+$ concentration in the ICS     | 130 mM       |
| $P_i$     | Recovery for $K^+$ in the ICS      | $0 s^{-1}$   |
| $R_k$     | Recovery for $K^+$ in the ECS      | $0 s^{-1}$   |
